# Supplementary material
Source: PubMed Central journal article supplement (PMC6626482)
Supplement: bcr-2019-229829supp001.pdf [file bcr-2019-229829supp001.pdf]

Supplementary Table: Characteristics of previously described cases of brugada syndrome and pattern

| Author/Ref      | Age/Sex | Presentation       | Cause/associati           | Comorbodities    | Management         |
|-----------------|---------|--------------------|---------------------------|------------------|--------------------|
| Bernado/6       | 49/m    | fever              | pneumonia                 | n/a              | antimicrobials     |
| Nagy/7          | 35/m    | fever/cough        | pneumonia                 | smoking          | antimicrobials/    |
| Nagi/7          | 74?m    | pleuritic chest p  | pneumonia                 | smoking,         | ICD,               |
| Vieira/8        | 1.5/m   | fever, HSM         | hemophagocytic            | n/a              | amikacin/doxyc     |
| Mendes/9        | 42/M    | syncope            | V fib                     | nothing          | cardioverted       |
| Sharma/10       | 10/m    | cough, chest pai   | pnm                       | myasthenia, htn  | antibiotics/icd    |
| Madeira/11      | 53/m    | fever, pleuritic c | pnm                       | htn, dyslipidmei | azithro, augmen    |
| lopez-caleya/12 | 46/M    | fever              | cellulitis                | smoking, family  | augmentin/ icd     |
| Boda/13         | 55/m    | fever ,chills      | malaria                   | family hx        | supportive care    |
| Martins/14      | 49/m    | fever, cough       | pnm                       | none             | icd., ceftriaxone  |
| Washington/15   | 33/m    | fever, cough       | diphtheria                | none             | penicillin g, dipl |
| Mody/16         | 42/m    | chest pain, fever  | none                      | none             | gentle hydrator    |
| Dominguez/17    | 45/m    | 62: fever, malais  | 62: pnm 42: unk           | none ,none,      | 62: Antibiotics 4  |
| Juhasz/18       | 67/m    | fever, cough, so   | parvovirus myo            | none             | refused icd,       |
| Picetti/19      | 39/m    | fever, flu like sy | vfib arrest               | right bundle blo | icd                |
| Meggiolaro/20   | 55/m    | fever              | falciparum mala           | none             | quinine, arteme    |
| Mijirilo/21     | 54/m    | fever, cough       | pneumonia                 | N/A              | antibiotics        |
| Pontillo/22     | 49/f    | fever              | pulmonary febrile illness |                  |                    |
| Kumar/23        | 18/f    | fever, abd pain    | acute cholecysti          | none             | conservative       |
| Zhou/24         | 40/M    | fever, syncope     | pulmonary infec           | none             | iv antibiotics     |
| Zhou/24         | 4/m     | fever, common c    | common cold               | none             | iv antibiotics     |
| Gandhi/25       | 46/m    | left leg pain      | cellulitis                | htn, dyslipidemi | iv cefazolin, tyle |
| Noris/26        | 69/m    | fever              | pnm, v fib                | none             | augmentin, azitl   |
| Shea/27         | 47/f    | fever, pain        | catheter site inf         | renal transplant | antibiotics        |
| Yalın/28        | 29/m    | syncopal episod    | N/A                       | family history   | ICD, paracetamc    |
| Wynne/29        | 21/f    | fever              | line infection            | esrd, PE, stroke | antibiotics,       |
| Traub/30        | 24/M    | fever, sore throa  | Asthma, HTN               |                  | ICD                |
| De marco/31     | 54/m    | fever,cough        | pnm                       | family hx        | conservative       |
| barra/32        | 68/f    | syncopal episod    | febrile                   | family history   |                    |
| Yalin/33        | 62/m    | fever, syncope     | flu like illness          | nothing          | ICD,               |
| Grogan/34       | 36/m    | fever, runny nos   | v flutter,                | family hx brugad | adenosine, amio    |
| Grogan/34       | 51/m    | fever, syncope     | pneumonia                 | family hx SCD p  | icD,               |
| Zaidi/35        | 4/m     | fever, headache    | viral UTI                 | SCD in paternal  | ICD,               |
| Johnson/ 36     | 49/f    | syncopal episod    | flu like symptom          | family hx heart  | ICD,               |
| Gonzalez/37     | 58/m    | chest pain, fever  | influenza                 | smoking,         | periodic follow    |
| Ozben/38        | 35/f    | fever, sore throa  | pharyngitis               | nothing          | follow up          |
| Alla/ 39        | 58/m    | fever, sore throa  | tonsillitis               | smoking,         | antibiotics, anti  |
| Lacunza/40      | 26/M    | fever, altered m   | heat stroke               | urine cocaine, o | heat stroke man    |
| Serletis/41     | 62/m    | fever, cough, so   | viral illness             | none             | follow up          |
| Patane/42       | 24/m    | pain left hypoch   | UTI with urinary stone    |                  |                    |
| Shalev/43       | 20/m    | fever, sore throa  | tonsillitis               | smoking, polym   | ICD, antibiotics.  |

|                 |           |                       |                   |                     |                    |
|-----------------|-----------|-----------------------|-------------------|---------------------|--------------------|
| Shinohara/44    | 22/m      | fever, throat pain    | common cold       | fam hx SCD mot      | ICD                |
| Hanazawa/45     | 39/m      | fever, generalized    | pneumonia         | Worked up for I     | meropenem, ICD     |
| Ambardekar/46   | 32/m      | loss of consciousness | mastitis, 1 week  | none, was on die    | Antibiotics, ICD   |
| Ott/47          | 30/m      | fever, sore throat    | viral pharyngitis |                     | antipyretic        |
| Skinner/48      | 19/m      | fever, seizures       | URTI              | hx of febrile fits, | antipyretics, ad   |
| Gavrielatos/49  | 69/m      | fever, abdominal      | cholecystitis     | alcohol, smoking    | induced by proc    |
| Sovari/50       | 24/m      | rt pleuritic pain     | pneumonia         | hyperlipidemia,     | cardiac cath -ve   |
| Unlu/51         | 22/m      | fever, shivering,     | pharyngitis       | none                | ibuprofen          |
| Karakitsos/52   | 31/m      | fever, respiratory    | klebsiella pnm    | not mentioned,      | cardiac workup     |
| Suzuki/53       | 26/m      | Syncope, fever,       | flu like illness  | scd in family       | ICD,               |
| Suzuki/54       | 62/m      | fever, chills, nau    | ill pnm           | HIV, candida, m     | cardiac workup     |
| Keller/55       | 61/m      | fever, cough, ple     | pnm               | no mentioned, v     | antipyretics, zo   |
| Wakita/55       | 69/m      | fever, chills, mil    | measles           |                     | ekg showed bur     |
| Kusaka/56       | 40/m      | cough, polyarth       | viral influenza B | not mentioned       | symptomatic        |
| Patruno/57      | 50/m      | fever, abdominal      | , not mentioned   | not mentioned       | refused ICD, ind   |
| Ortega-carnicer | 55/m      | fever, ST elevati     | viral URTI        | none                | symptomatic        |
| Mok/59          | 69/f      | RUQ abd pain, fe      | acute cholangiti  | not mentioned       | iv antibiotics, la |
| Kum/60          | 48/m      | fever, cough, ple     | right lower lobe  | no mentioned        | symptomatic        |
| Porres/61       | 74/m      | fever, presyncop      | pharyngitis, ton  | hx of multiple e    | multiple episod    |
| Morita/62       |           | fever                 | URTI              | hx of v fib arrest  | cardiac cath did   |
| Saura/63        |           | fever, cough, chi     | left upper lobar  | HTN on ACE          | iv ceftriaxone ar  |
| Das/64          | 9/m       | neutropenic fev       | AML chemo         | n/a                 | ICD                |
| Tessitori/65    | 40/m      | altered mental status |                   |                     |                    |
| Porto/66        | 31/m      | diarrhea              | sepsis            |                     | icd, iv antibiotic |
| Stankovic/67    | 45/m      | fall,                 | syncope           |                     | icd,               |
| Khalid/68       | 42m, 62 f | cough, chest pai      | pnm               | dyslipidemia        | cef/azithro/       |
| Singla/69       | 24/m      | fever, chills, rig    | pneumococcal b    | none                | NTG, vancomyci     |
| Baranchuck/70   | 66/f      | syncope, flu          | post influenza p  | scd of brother,     | icd,               |
| Siniorakis/71   | 80/M      | fever, (repeat 9      | cholecystitis     | none                | none               |



|           |
|-----------|
| resolved  |
| resolved, |
| resolved  |

resolved, f/u advised

resolved, follow up

|          |
|----------|
| resolved |
|----------|

resolved, discharged

|          |
|----------|
| resolved |
|----------|

|    |
|----|
| n/ |
|----|

|  |
|--|
|  |
|--|

|          |
|----------|
| resolved |
|----------|

|          |
|----------|
| resolved |
|----------|
